# Supplementary material for: Orthotopic Glioblastoma Models for Evaluation of the Clinical Target Volume Concept
Source: MDPI journal article supplement (doi:10.3390/cancers14194559), 2022-09-20
Supplement: s1 [file s1]

**Supplementary Materials:**

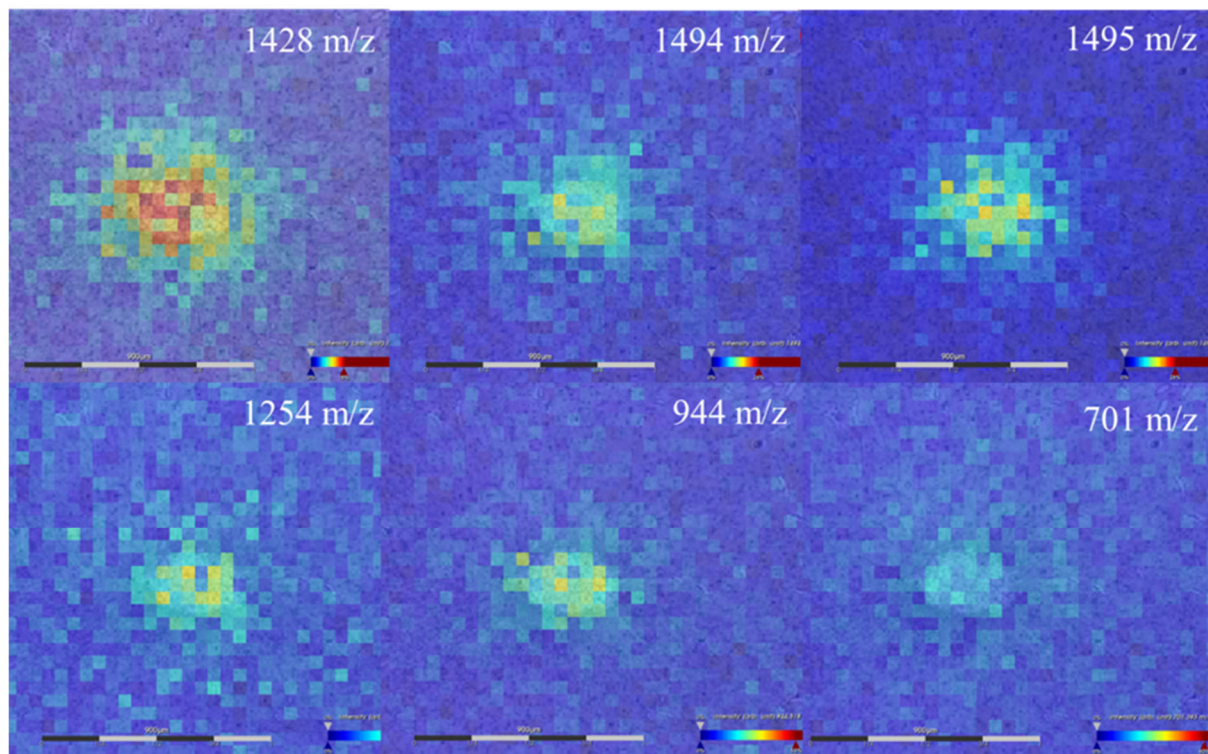

**Figure S1.** MALDI imaging of one exemplary G7\_mCherry tumor. Most relevant tumor specific masses are displayed. No clear tumor border can be visualized.

**Table S1.** List of discriminative mass values ( $m/z$ ) for U87MG\_mCherry tumors including mean intensities and ROC values of background vs. tumor and tumor vs. background analysis, respectively.

| Mass Value ( $m/z$ ) | Mean Intensity<br>(200 mDa) | AUC   | Distribution |
|----------------------|-----------------------------|-------|--------------|
| 615.3                | 10.84                       | 1     | Brain tissue |
| 643.3                | 39.45                       | 1     | Brain tissue |
| 705.4                | 29.28                       | 1     | Brain tissue |
| 707.4                | 6.04                        | 1     | Brain tissue |
| 722.4                | 4.46                        | 1     | Brain tissue |
| 836.4                | 2.96                        | 0.999 | Tumor        |
| 852.5                | 3.39                        | 0.997 | Tumor        |
| 898.5                | 2.64                        | 0.996 | Tumor        |
| 914.5                | 2.92                        | 0.998 | Tumor        |
| 915.5                | 3.06                        | 0.996 | Tumor        |
| 943.6                | 3.08                        | 0.986 | Tumor        |
| 944.5                | 10.12                       | 0.987 | Tumor        |
| 1028.6               | 3.12                        | 0.993 | Tumor        |
| 1095.6               | 2.04                        | 0.996 | Tumor        |
| 1106.6               | 2.23                        | 0.999 | Tumor        |
| 1339.7               | 11.17                       | 0.999 | Brain tissue |
| 1428.7               | 3.02                        | 0.999 | Tumor        |
| 1428.7               | 1.13                        | 0.999 | Tumor        |
| 1429.7               | 1.12                        | 0.999 | Tumor        |
| 1459.7               | 0.91                        | 0.996 | Tumor        |
| 1465.7               | 1.03                        | 0.996 | Tumor        |
| 1494.7               | 1.48                        | 0.997 | Tumor        |
| 1495.8               | 1.71                        | 0.999 | Tumor        |
| 1496.8               | 1.26                        | 0.999 | Tumor        |
| 1562.8               | 0.5                         | 0.994 | Tumor        |

**Table S2.** List of discriminative mass values ( $m/z$ ) including mean intensities and ROC values of tumors. Several tumor peaks were also present in normal brain tissue since the G7\_mCherry tumor cells are much more invasive compared to U87MG mCherry.

| Mass value ( $m/z$ ) | Mean intensity<br>(150 mDa) | AUC   | Distribution         |
|----------------------|-----------------------------|-------|----------------------|
| 914.3                | 1.886                       | 0.595 | Tumor / Brain tissue |
| 1028.5               | 1.459                       | 0.689 | Tumor / Brain tissue |
| 1254.6               | 0.732                       | 0.600 | Tumor / Brain tissue |
| 1428.7               | 1.153                       | 0.907 | Tumor                |
| 1429.6               | 1.036                       | 0.671 | Tumor / Brain tissue |
| 1430.7               | 0.672                       | 0.664 | Tumor / Brain tissue |
| 1494.7               | 1.025                       | 0.587 | Tumor / Brain tissue |
| 1495.8               | 1.325                       | 0.737 | Tumor / Brain tissue |
| 1496.1               | 0.955                       | 0.743 | Tumor / Brain tissue |
| 1497.8               | 0.621                       | 0.727 | Tumor / Brain tissue |
